1 Transcriptomic profiling of human orbital fat and differentiating orbital fibroblasts

2  
3 Running head: RNAseq analyses of human orbital fat & fibroblasts

4  
5  
6 Dong Won Kim<sup>1</sup>, Kamil Taneja<sup>2</sup>, Thanh Hoang<sup>1</sup>, Clayton P. Santiago<sup>1</sup>, Timothy J.  
7 McCulley<sup>2</sup>, Shannath L. Merbs<sup>3</sup>, Nicholas R. Mahoney<sup>2</sup>, Seth Blackshaw<sup>1,2,4-6</sup>, Fatemeh  
8 Rajaii<sup>2\*</sup>

9  
10  
11 <sup>1</sup>Solomon H. Snyder Department of Neuroscience,

12 <sup>2</sup>Department of Ophthalmology, Wilmer Eye Institute, Johns Hopkins University School  
13 of Medicine, Baltimore, MD, <sup>3</sup>Department of Ophthalmology and Visual Sciences,  
14 University of Maryland School of Medicine, Baltimore, Maryland, USA, <sup>4</sup>Department of  
15 Neurology, <sup>5</sup>Institute for Cell Engineering, and <sup>6</sup>Kavli Neuroscience Discovery Institute,  
16 Johns Hopkins University School of Medicine, Baltimore, MD

17  
18 \*To whom correspondence should be addressed at

19 [frajaii1@jhmi.edu](mailto:frajaii1@jhmi.edu) (F.R.)

20  
21 **Word count:** 3469

22 **Funding:** This work was supported by an unrestricted departmental grant to the Wilmer  
23 Eye Institute from Research to Prevent Blindness. DWK is supported by the Maryland  
24 Stem Cell Research Fund (2019-MSCRFF-5124). SB is supported by NIH Grant  
25 R01EY020560. FR is supported by the National Eye Institute of the National Institutes of  
26 Health under award number K08EY027093.

27 **Commercial Relationships:** F. Rajaii: Horizon Therapeutics (C, I). S. Blackshaw: CDI  
28 Labs (I, P, R), Genentech (F), Third Rock Ventures (C).

## 29 **Structured Abstract**

30

### 31 **Purpose**

32 Orbital fat hyperplasia has a central role in the manifestations of thyroid-associated  
33 orbitopathy (TAO). To better understand the pathways involved in adipogenesis in TAO,  
34 we have used transcriptomic methods to analyze gene expression in control and TAO  
35 patients, as well as in differentiating orbital fibroblasts (OFs).

36

### 37 **Methods**

38 We performed bulk RNA sequencing (RNA-Seq) on intraconal orbital fat to compare  
39 gene expression in control and TAO patients. We treated cultured OFs derived from  
40 TAO patients with media containing dexamethasone, insulin, rosiglitazone, and  
41 isobutylmethylxanthine (IBMX) to induce adipogenesis. We used single nuclear RNA-  
42 Seq (snRNA-Seq) profiling of treated OFs to compare gene expression over time in  
43 order to identify pathways that are involved in orbital adipogenesis *in vitro* and  
44 compared the dynamic patterns of gene expression identify differences in gene  
45 expression in control and TAO orbital fat.

46

### 47 **Results**

48 Orbital fat from TAO and control patients segregate with principal component analysis  
49 (PCA). Numerous signaling pathways are enriched in orbital fat isolated from TAO  
50 patients. SnRNA-Seq of orbital fibroblasts undergoing adipogenesis reveals differential  
51 expression of adipocyte-specific genes over the developmental time course.  
52 Furthermore, genes that are enriched in TAO orbital fat are also upregulated in orbital  
53 adipocytes that differentiate *in vitro*, while genes that are enriched in control orbital fat  
54 are enriched in orbital fibroblasts prior to differentiation.

55

### 56 **Conclusions**

57 Differentiating orbital fibroblasts serve as a model to study orbital fat hyperplasia seen in  
58 TAO. We demonstrate that the insulin-like growth factor-1 receptor (*IGF-1R*) and Wnt  
59 signaling pathways are differentially expressed early in orbital adipogenesis.

60

### 61 **Précis**

62 To understand the pathways involved in adipogenesis in TAO, we used transcriptomic  
63 methods to analyze gene expression in control and TAO patients, as well as in  
64 differentiating OFs. We demonstrate that the IGF-1R and Wnt signaling pathways are  
65 differentially expressed during orbital adipogenesis.

66

## 67 **Introduction**

68 Thyroid-associated orbitopathy (TAO) is a form of autoimmune thyroid disease in  
69 which shared auto-antigens in the thyroid gland and orbit are targets of the immune  
70 response.<sup>1-3</sup> About 25% of patients with autoimmune thyroid disease will develop the  
71 ocular disease, which can be vision-threatening. It is thought that inflammatory signaling  
72 causes expansion of the orbital soft tissues due to fibrosis and orbital fat hyperplasia  
73 which causes ocular morbidity due to corneal exposure and/or compressive optic  
74 neuropathy.<sup>4-6</sup>

75 The orbital soft tissue expansion that causes vision loss and other ocular  
76 morbidity associated with TAO is thought to be the final step of an inflammatory  
77 cascade that results in fibrosis and adipogenesis. Details of the mechanisms underlying  
78 orbital soft tissue fibrosis and adipogenesis are not well understood. Generally,  
79 adipogenesis is initiated by transcription factor cascades involving transient early  
80 expression of CCAAT/enhancer-binding protein (C/EBP)  $\beta$  and  $\delta$  followed by induction  
81 of CEBP- $\alpha$  and peroxisome proliferator-activated receptor  $\gamma$ , transcription factors, which  
82 in turn induce expression of genes involved in terminal adipocyte differentiation.<sup>7,8</sup>  
83 These pathways contribute to a generic adipocyte differentiation program. However,  
84 adipocyte metabolic function, morphology, preadipocyte proliferation and capacity for  
85 adipogenesis differ among adipose tissue depots.<sup>9</sup> These molecular and physiological  
86 differences, which have been explored in subcutaneous, visceral, and brown adipose  
87 tissue depots, are thought to be intrinsic to adipocytes and may be related to their  
88 embryonic origins.<sup>9</sup> The differences in orbital adipose tissue, and the way in which they  
89 may contribute to the TAO phenotype, however, have not yet been explored.

90 To identify molecular mechanisms controlling adipogenesis in TAO, we have  
91 conducted bulk RNA-Seq analysis of primary orbital fat from both control and TAO  
92 patients and also used snRNA-Seq to profile orbital fibroblasts undergoing adipogenesis  
93 *in vitro*.

94

## 95 **Methods**

### 96 **Bulk RNA-Seq**

97 Human intraconal orbital fat was obtained from TAO patients undergoing orbital  
98 decompression or controls undergoing routine resection of prolapsed orbital fat (Table  
99 1), which has been shown to be intraconal fat,<sup>10</sup> or enucleation using a protocol  
100 approved by the Johns Hopkins University Institutional Review Board and following the  
101 tenets of the Declaration of Helsinki. TAO patients were inactive, defined by a clinical  
102 activity score (CAS) less than 4.<sup>11</sup> Samples were placed in RNA $later^{\text{TM}}$  (ThermoFisher  
103 Scientific) or on ice, depending on their subsequent use. RNA was extracted from each  
104 fat depot using Trizol and RNeasy mini kits (Qiagen, Germany). Bioanalyzer (Agilent)  
105 analysis was used to perform quality control. cDNA libraries were prepared for samples  
106 with RIN > 6. RNA-Sequencing libraries were made using stranded Total RNASeq  
107 library prep and libraries were sequenced using Illumina Nextseq500, paired-end read  
108 of 75 bp, 50 million reads per library. Illumina adapters of libraries after sequencing  
109 were removed using Cutadapt (v1.18)<sup>12</sup> with default parameters. Sequenced libraries  
110 were then aligned to GRCh38 using STAR (v2.42a)<sup>13</sup> with `--twopassMode Basic`. RSEM  
111 (v1.3.1)<sup>14</sup> was used for transcript quantification, with `rsem-calculate-expression (--`  
112 `forward-prob 0.5)`.

113 DESeq2(1.24.0)<sup>15</sup> was used to analyze the bulk RNA-Seq dataset using the  
114 standard pipeline, filtering low counts (<10) and choosing genes with adjusted p-value <  
115 0.05. ClusterProfiler (v3.12.0)<sup>16</sup> *enrichKEGG* function was used to identify pathways that  
116 are enriched in the TAO group.

117

### 118 ***In vitro* differentiation**

119 Orbital fibroblast cell lines were derived from TAO retrobulbar fat as previously  
120 described.<sup>17</sup> Briefly, tissue explants were obtained from patients undergoing surgical  
121 decompression for TAO. Patients were inactive, with a CAS less than 4, at the time of  
122 surgery.<sup>11</sup> Explants were placed on the bottom of culture plates and covered with  
123 Eagle's medium containing 10% FBS, antibiotics, and glutamine. They were incubated  
124 at 37°C, 5% CO<sub>2</sub>, in a humidified environment. The resulting fibroblast monolayers were  
125 passaged serially by gentle treatment with TrypLE. Strains were stored in liquid N<sub>2</sub> until  
126 needed and were used between the 4th and 8th passages.

127 Orbital fibroblasts were induced to undergo adipogenesis as previously  
128 described.<sup>17</sup> Briefly, fibroblasts between passages 4 and 8 were seeded on plastic  
129 tissue culture plates and allowed to proliferate to near-confluence in DMEM containing  
130 10% FBS and antibiotics. The cells were then treated with adipogenic medium  
131 consisting of DMEM:F-10 (1:1) supplemented with 3% FBS, 100 nmol/liter insulin, 1  
132  $\mu\text{mol/liter}$  dexamethasone, and for the first week only, 1  $\mu\text{mol/liter}$  rosiglitazone and 0.2  
133 mmol/liter IBMX. Media was changed every other day for the first week, and then twice  
134 weekly for the remaining weeks. Cultures were maintained in this medium for 21 days.

135 Control cultures were treated with DMEM:F-10 (1:1) supplemented with 3% FBS and  
136 vehicle. Differentiation was observed using a Nikon microscope. Each time point was  
137 analyzed in triplicate.

138

### 139 **Quantification of adipocytes**

140 On days 0, 5, 9, and 21, cells were washed with PBS and fixed using 4%  
141 paraformaldehyde in PBS for 10 minutes at room temperature. Cells were washed with  
142 PBS or stored in PBS at 4°C. To stain adipocytes, cells were washed with 60%  
143 isopropanol and stained with freshly prepared 0.3% (w/v) Oil red O at room temperature  
144 for 15 minutes. Cells were rinsed with isopropanol and stained lightly with hematoxylin,  
145 then rinsed with PBS. Cells were imaged by a blinded study team member using a  
146 Keyence BZ-X710 microscope (Keyence, Japan). Four high-power field images were  
147 obtained per replicate. Cell counts and lipid vacuole measurements were performed  
148 using ImageJ.<sup>18</sup>

149

### 150 **Single-nucleus RNA-Seq**

151 Nuclei from the treated groups were isolated at day 0, 5, 9, and 21 using the  
152 methods described in the 10x Genomics Sample Preparation Demonstrated Protocol.  
153 Briefly, cells were washed with chilled PBS and lysed in chilled lysis buffer consisting of  
154 10 mM Tris-HCl, 10 mM NaCl, 3 mM MgCl<sub>2</sub>, and 0.1% Nonidet™ P40 Substitute in  
155 nuclease-free water at 4°C. Cells were scraped from the plate bottom and centrifuged at  
156 500 RCF for 5 min at 4°C. Cells were washed twice in nuclei wash and resuspension  
157 buffer consisting of PBS with 0.1% BSA and 0.2 U/ul RNase inhibitor. Cells were  
158 passed through a 50 um cell strainer and centrifuged at 500 RCF for 5 min at 4°C prior  
159 to resuspension in nuclei wash and resuspension buffer. Isolated nuclei were counted  
160 manually via hemocytometer with Trypan Blue staining, and nuclei concentration was  
161 adjusted following the 10x Genomics guideline. 10x Genomics Chromium Single Cell  
162 system (10x Genomics, CA, United States) using V2 chemistry (Day 0, 5, 9) or V3  
163 chemistry (Day 21) per manufacturer's instructions, generating a total of 7 libraries. Day  
164 5 and Day 21 were run with technical replicates. Libraries were sequenced on Illumina  
165 NextSeq500 mid-output or NovaSeq6000 (150 million reads). Sequencing data were  
166 first pre-processed through the Cell Ranger pipeline (10x Genomics, Cellranger v5.0.0)  
167 with default parameters, using GRCh38-2020-A genome with *include-introns*.

168 Matrix files generated from the Cellranger run were used for subsequent  
169 analysis. Seurat V3<sup>19</sup> was used to perform downstream analysis, only including cells  
170 with more than 500 genes, 1000 UMI, to process control and treated samples  
171 separately. Seurat SCTransform function was used to normalize the dataset<sup>20</sup> and  
172 UMAP was used to reduce dimensions derived from the Harmony<sup>21</sup> output.

173 In order to identify cells that show adipocytes signatures, key adipocytes-  
174 enriched genes were first extracted from GTEx dataset from [ascot.cs.jhu.edu](http://ascot.cs.jhu.edu)<sup>22</sup>, relying

175 on both robustness (NAUC > 20) and specificity (expressed only in both adipocytes  
176 dataset or in tissues that are enriched with adipocytes such as mammary tissues).  
177 These genes were then used to train the dataset using Garnett<sup>23</sup> and identified  
178 differentiated adipocytes.

179 RNA velocity<sup>24</sup> was used to verify *in vitro* adipocyte differentiation trajectory.  
180 Kallisto and Bustools<sup>25</sup> were used to obtain splicing values, and Scanpy<sup>26</sup> and scVelo<sup>27</sup>  
181 were used to obtain velocity trajectory. Pseudotime analysis was performed using  
182 Monocle v3<sup>28</sup> and genes that are significant (q value < 0.001) along pseudotime  
183 trajectory were used to run KEGG analysis as described above. Genes that were  
184 involved across KEGG signaling pathways were then used to identify signaling  
185 pathways that are specific at different stages of *in vitro* differentiation. SCENIC<sup>29</sup> was  
186 used to calculate regulons controlling gene expressions across adipocytes  
187 differentiation stages as previously described.<sup>30,31</sup> Enriched genes from control and TAO  
188 bulk RNA-Seq datasets were superimposed on *in vitro* dataset using Seurat  
189 *AddModuleScore* function.

190

191 **Data availability:** All sequencing data are available on GEO as GSE158464 (bulk RNA-  
192 Seq dataset) and GSE174139 (bulk RNA-Seq dataset and snRNA-Seq).

## 193 Results

### 194 Bulk transcriptome analysis of retrobulbar fat from TAO and control patients

195 Retrobulbar fat was collected from patients undergoing orbital surgery for TAO or  
196 other indications (Table 1). To compare gene expression in orbital fat in TAO patients  
197 and controls, bulk RNA-Seq was performed (Figure 1a). Gene expression in TAO and  
198 control orbital fat segregated using PCA, with control and TAO replicates appearing  
199 more similar (Figure 1b). We observed 902 genes that are enriched in control orbital fat,  
200 and 964 genes enriched in TAO orbital fat (Figure 1c). Kyoto Encyclopedia of Genes  
201 and Genomes (KEGG) pathway analysis of genes enriched in TAO orbital fat revealed  
202 numerous signaling pathways that are highly enriched including PI3K-Akt signaling,  
203 cAMP signaling, AGE-RAGE signaling, regulation of lipolysis in adipocytes, and thyroid  
204 hormone signaling pathway (Figure 1d). Heat map analysis of genes that are  
205 differentially expressed (adjusted p-value < 0.05, Table S1) in TAO fat and control fat  
206 demonstrated general differences between TAO and control orbital fat, while also  
207 identifying differences that correlate with the patient's clinical activity score (CAS) at the  
208 time of surgery (Figure 1e, Table 1). Heat map analysis of individual genes within the  
209 above-mentioned pathways demonstrated the degree to which genes such as *THRA*  
210 and *IGF1* are enriched in TAO orbital fat (Figure 1f).

211

## 212 **snRNA-Seq of orbital fibroblasts undergoing adipogenesis reveals induction of** 213 **adipocyte-specific markers**

214 Orbital fibroblasts derived from Case #2 were treated to induce adipogenesis  
215 using over a 21-day time course to find genes that are induced during adipogenesis  
216 which may function critically in orbital fat hyperplasia in TAO. Cells treated with control  
217 media did not undergo adipogenesis (Figure 2a,c,e,g). Based on histologic changes  
218 noted in cells treated with adipogenic media, we chose to analyze adipogenesis and  
219 gene expression at Days 0, 5, 9, and 21 (Figure 2a-h). Adipocyte induction first  
220 occurred between day 0-5, which the maximum density of adipocytes noted at day 9  
221 (Figure 2i). Adipocyte maturation, as quantified by the lipid vacuole area, increased  
222 most between days 9 and 21 (Figure 2j).

223 Based on the observed histologic changes, we collected nuclei at days 0, 5, 9,  
224 and 21 treatment for analysis by snRNA-Seq (Figure 2k). We identified unique clusters  
225 that are enriched from Day 5 onwards and begin to express unique sets of markers that  
226 were absent in the rest of the clusters, such as *IGF1* (Figure S1, Table S2). These  
227 clusters led to a cluster that expressed high levels of adipocyte signatures including  
228 *ADIPOQ* (Figure S1, Table S2). We identified these clusters as cells that are  
229 undergoing adipogenesis.

230 UMAP analysis of differentiating orbital fibroblasts revealed 6 distinct clusters  
231 defined by a unique set of genes (Figure 2l). Overall, differentiating cells appeared to  
232 progress from cluster 1 (C1) to C6 over time (Figure 2m). Classic adipocyte stem cell  
233 markers such as *FABP4*, *APOE*, *FABP5* were enriched in C3-C4, while mature  
234 adipocyte markers such as *PPARG* and *ADIPOQ* were enriched in C5, demonstrating  
235 that the clusters corresponded to a developmental progression from orbital fibroblast,  
236 through adipocyte stem cells, to mature adipocytes (Figure 2n, Table S3). At day 21, a  
237 new cell type was present that demonstrated high expression of *APOD*, but had lost  
238 expression of other adipogenic markers such as *FABP4/5* but shared expression of  
239 many of the other markers expressed in other clusters were represented in cluster C6  
240 (Figure 2n). To identify genes that were induced early in the process of adipogenesis,  
241 we focused on genes that were specifically expressed in C1 and C2, which differed from  
242 both quiescent, control-treated orbital fibroblasts and adipocyte stem cells. This  
243 population showed enrichment of *IGF1*, *IGF1R*, *ZEB1*, *FGF7*, and *SFRP2* expression  
244 (Figure 2n). Enrichment of *IGF1* expression within differentiating orbital fibroblasts  
245 suggests that paracrine signaling may be involved in the process of adipogenesis.  
246

## 247 **Analysis of key pathways involved in orbital adipogenesis *in vitro***

248 We next focused on identifying key signaling pathways and potential regulatory  
249 factors that are differentially expressed during orbital adipogenesis *in vitro*. Using KEGG  
250 analysis of the snRNA-Seq data, we observed that differentiating adipocytes express  
251 genes involved in multiple signaling pathways, including the PI3-AKT pathway, AGE-

252 RAGE signaling pathway, insulin resistance pathway. These pathways were also  
253 enriched in TAO orbital fat compared to control orbital fat, as measured by bulk RNA-  
254 Seq analysis (Figure 1c, 3a). Other pathways that are specifically involved in  
255 adipogenesis, such as the PPAR signaling pathway, fatty acid biosynthesis and fatty  
256 acid elongation pathways (Figure 3a) were also enriched in differentiating orbital  
257 fibroblasts.

258 RNA velocity analysis demonstrated that components of the Rap1 signaling  
259 pathway are active early in orbital fibroblasts in C1 (Figure 3b). Components of the  
260 insulin signaling pathway were expressed throughout the course of adipocyte  
261 differentiation in C1-C5 (Figure 3b), while peroxisome proliferator-activated receptor  
262 (PPAR) signaling, which is known to be active late in adipogenesis, was active in C4-C5  
263 (Figure 3b). Pseudotime analysis showed the progression of gene expression through  
264 C1-C5 for all differentially-expressed genes (Figure 3c). Genes with particularly strong  
265 differential expressions are highlighted, such as *IGF1*, *SFRP2*, and *WNT5A* (Figure 3c,  
266 Table S4). Regulon analysis identified transcription factors that are differentially  
267 expressed in each cluster (Figure 3d).

268

## 269 **The TAO orbital fat transcriptome resembles that of *in vitro* differentiated** 270 **adipocytes**

271 In order to determine the similarity between *in vitro* derived orbital adipocytes and  
272 orbital fat *in vivo*, we compared gene expression from control and TAO orbital fat,  
273 analyzed by bulk RNA-Seq, to gene expression during orbital adipogenesis as  
274 assessed by snRNA-Seq (Figure 4a). Control gene modules were found to be  
275 expressed most highly in C1 and C6. These modules were most strongly expressed in  
276 day 0 cells (C1) and a subset of day 21 cells that do not express mature adipocyte  
277 markers (C6) (Figure 4b-d). TAO gene modules were expressed most highly in C5, and  
278 at days 9 and 21 (Figure 4e,f). Interestingly, although the orbital fibroblast cell line was  
279 derived from a TAO patient, the gene expression pattern resembled control gene  
280 modules prior to treatment with adipogenic media (Figure 4c,d), and changes to  
281 resemble TAO genes modules following treatment with adipogenic media (Figure 4 f,g).

282

## 283 **Discussion**

284 In this study, we demonstrate that orbital fibroblasts derived from TAO patients  
285 can be used as a model to study adipogenesis *in vitro*. Histologic studies and  
286 transcriptome profiling clearly show that, although they are derived from TAO patients,  
287 the gene expression profile of undifferentiated orbital fibroblasts closely resembles that  
288 of control orbital fat cells, while those treated to undergo adipogenesis display a gene  
289 expression profile more similar to that of TAO orbital fat.

290 We have identified signaling pathways and transcription factors that are  
291 upregulated early in orbital adipogenesis, including the IGF-1 signaling pathway, which



292 has previously shown to contribute to TAO pathophysiology by increasing auto-antigen  
293 display, cytokine synthesis, and hyaluronan production by orbital fibroblasts.<sup>32,33</sup> The  
294 novel TAO therapy teprotumumab targets the IGF-1 receptor (IGF1-R) to improve  
295 proptosis, diplopia, CAS, and quality of life in TAO patients.<sup>34,35</sup> Though it is thought to  
296 exert its effects via modulation of the immune response, our data raise the possibility  
297 that inhibition of the IGF-1R pathway may also impact TAO by reducing adipogenesis in  
298 the orbit.

299 Prior transcriptome profiling of cultured orbital fibroblasts derived from control  
300 and TAO patients has demonstrated significantly increased expression of homeobox  
301 transcription factors and decreased expression of Wnt signaling pathway components  
302 in TAO orbital fibroblasts.<sup>36</sup> In profiling TAO orbital fibroblasts undergoing adipogenesis,  
303 we find that *WNT5A* expression is high early in the course of adipogenesis, but  
304 decreases as differentiation occurs, whereas homeobox gene expression increases later  
305 (Figure 3c,d).

306 The model that we have used to study gene expression changes during orbital  
307 adipogenesis depends on the treatment of orbital fibroblasts with drugs including insulin  
308 and rosiglitazone. For example, while cells are treated with insulin throughout the  
309 experiment, and the insulin pathway is active throughout the differentiation process,  
310 cells are also treated with the PPAR gamma agonist rosiglitazone early (during the first  
311 week) in the experiment, but PPAR signaling is active only later in the differentiation  
312 process (Figure 3b).

313 Microarray comparisons of orbital fat from TAO and control patients have  
314 demonstrated increased expression in Wnt signaling pathway genes such as SFRPs,  
315 IGF-1 pathway genes, and adipogenic genes, consistent with our bulk RNA-Seq  
316 results.<sup>37,38</sup> In our heat map analysis of TAO-enriched genes, we note differences in the  
317 level of gene expression that correlate with CAS. Case 1, with a CAS of 0, has lower  
318 levels of TAO-enriched genes than Case 2, with a CAS of 1, which in turn has lower  
319 levels of TAO-enriched genes than Case 3, with CAS of 3 (Figure 1e). However, even in  
320 the least severely affected patient, TAO-enriched genes are more highly expressed than  
321 in controls (Figure 1e).

322 Other studies have compared RNA-Seq data of orbital fat from patients with  
323 active TAO compared to blepharoplasty fat and observed stronger upregulation of  
324 inflammatory signaling pathways, which is consistent with the higher CAS in their  
325 patients compared to those profiled in our study.<sup>39</sup> Conversely in our patients, pathways  
326 including insulin and thyroid signaling, as well as adipogenic pathways, were more  
327 prominent, likely reflective of the patients being in earlier stages of the disease. In  
328 addition, we used retrobulbar fat as our control orbital adipose sample, rather than  
329 blepharoplasty fat, which may account for some of the other observed differences in  
330 gene expression. A potential confounding factor in comparing these data sets may be  
331 that in our analysis, we have excluded all genes with low counts due to low expression

332 levels. Nonetheless, we also found large changes in Wnt signaling such as (*DKK2*,  
333 *NKD1*) and other pathways (*HOX3D*) in TAO orbital fat compared to control orbital fat in  
334 post-hoc analysis (Table S1), although these genes were expressed at low levels.

335 We further have identified factors that have not been previously implicated in the  
336 biology of orbital fibroblasts, including cell-autonomous pathways such as Rap1  
337 signaling, which have been shown to drive adipogenesis in human bone mesenchymal  
338 stem cells.<sup>40,41</sup> In addition, transcription factors that drive adipogenesis are of  
339 particular interest in understanding the regulation of orbital adipogenesis. ZEB1 has  
340 been identified as a critical mediator of adipogenesis in mouse pre-adipocytes and is  
341 induced by IGF-1R activation in prostate cancer cell lines.<sup>42,43</sup> Finally, the use of *in vitro*  
342 analysis of differentiating cultured orbital fibroblasts to identify pathways that regulate  
343 orbital adipogenesis, and that are enriched in TAO orbital fat, opens the possibility of  
344 using high-throughput screening to identify drug and gene-based approaches to  
345 modulating pathological adipogenesis that may ultimately be useful in treating TAO-  
346 related disorders.

347  
348 **Acknowledgements:** This work was supported by an unrestricted departmental grant  
349 to the Wilmer Eye Institute from Research to Prevent Blindness. DWK is supported by  
350 the Maryland Stem Cell Research Fund (2019-MSCRFF-5124). SB is supported by NIH  
351 Grant R01EY020560. FR is supported by the National Eye Institute of the National  
352 Institutes of Health under award number K08EY027093. We thank the Transcriptomics  
353 and Deep Sequencing Core (Johns Hopkins) for sequencing of snRNA-Seq libraries.  
354 We also thank Lizhi Jiang for technical assistance.

355  
356  
357  
358  
359  
360  
361  
362  
363  
364  
365

366 **Figure legends:**

367 **Table 1. Characteristics of TAO and control patients undergoing orbital surgery.**

368 Caucasian (C). African American (AA). Uveal Melanoma (UM).

369

370 **Figure 1. Bulk RNA-Seq analysis comparing retrobulbar fat of control and TAO**

371 **patients.** (a) Schematic diagram showing the overall experiment pipeline. (b) PCA plot  
372 showing the distribution of control and TAO replicates. (c) Volcano plot of genes that are  
373 higher in control or TAO orbital fat. (d) KEGG pathway analysis showing pathways that  
374 are enriched in the TAO group. (e) Heatmap demonstrating gene expression differences  
375 between the control and TAO. (f) Top KEGG pathways in 1d and genes that are  
376 expressed at a higher level in TAO than in the control group (Fold change). CAS =  
377 Clinical activity score.

378

379 **Figure 2. snRNA-Seq shows adipogenesis trajectory *in vitro*.** (a-h) Oil Red O

380 staining (arrows) of orbital fibroblasts treated with control (a,c,e,g) and adipogenic  
381 (b,d,f,h) medium orbital at day 0 (a,b), day 5 (c,d); day 9 (e,f), and day 21 (g,h). (i) Bar  
382 plot showing the percentage of adipocytes seen after treatment with control or  
383 adipogenic medium on days 0, 5, 9, and 21. (j) Bar plot showing lipid vacuole area / the  
384 number of adipocytes between orbital fibroblasts treated with control or adipogenic  
385 medium on days 0, 5, 9, and 21. (k) Schematic diagram showing snRNA-Seq pipeline.  
386 (l) UMAP plot showing key 6 clusters of cells undergoing adipogenesis from snRNA-  
387 Seq. (m) Bar plot showing the percentage of clusters that are occupied across treatment  
388 days. (n) Violin plot showing key cluster markers. Scale bar = 100  $\mu$ M.

389

390 **Figure 3. snRNA-Seq reveals adipogenesis signaling pathway.** (a) KEGG plot

391 based on pseudotime analysis from snRNA-Seq data in Figure 2. (b) UMAP plot with  
392 RNA velocity showing adipocyte differentiation trajectory, and 3 pathways that are  
393 specific across differentiation stages. (c) Pseudotime trajectory of adipogenesis and key  
394 genes. (d) Regulon analysis demonstrates key transcription factors that might be  
395 involved in each step of adipogenesis differentiation.

396

397 **Figure 4. *In vitro* differentiated adipocytes express high levels of TAO tissue-**

398 **enriched markers.** (a) Schematic showing that genes that are higher in control or TAO  
399 orbital fat were projected into snRNA-Seq dataset to obtain gene module score. (b-d)  
400 Control retrobulbar fat-enriched genes demarcate Cluster 6 in snRNA-Seq dataset (b,d),  
401 expressed higher at day 0 (c). (e-g) TAO retrobulbar fat-enriched genes demarcate  
402 Cluster 5 adipocytes in snRNA-Seq dataset (e,f), expressed higher at day 0 (g).

403

404

405 **Figure S1. snRNA-Seq of the overall dataset.** (a,b) UMAP plot showing the  
406 distribution of clusters across the entire dataset (a) and distribution across each  
407 treatment age or replicates (Day 9 and Day 21) (b). Red lines in panels a and b indicate  
408 cells are undergoing adipogenesis. (c) Gene expression showing unique genes that are  
409 enriched in cells that are undergoing adipogenesis.

410

411 **Table S1.** Significant genes from bulk RNA-Seq of control and TAO retrobulbar orbital  
412 fat in Figure 1.

413 **Table S2.** Cluster markers of Figure S1a.

414 **Table S3.** Cluster markers of Figure 2l.

415 **Table S4.** Pseudotime genes of Figure 3c.

416

417

418

419

420

421

422

423

## 424 References

- 425 1. Bahn RS, Dutton CM, Natt N, Joba W, Spitzweg C, Heufelder AE. Thyrotropin  
426 receptor expression in Graves' orbital adipose/connective tissues: potential  
427 autoantigen in Graves' ophthalmopathy. *J Clin Endocrinol Metab.* 1998  
428 Mar;83(3):998–1002.
- 429 2. Crisp M, Lane C, Halliwell M, Wynford-Thomas D, Ludgate M. Thyrotropin  
430 Receptor Transcripts in Human Adipose Tissue [Internet]. Vol. 82, *The Journal of*  
431 *Clinical Endocrinology & Metabolism.* 1997. p. 2003–5. Available from:  
432 <http://dx.doi.org/10.1210/jcem.82.6.2003>
- 433 3. Porcellini A, Ruggiano G, Pannain S, Ciullo I, Amabile G, Fenzi G, et al. Mutations  
434 of thyrotropin receptor isolated from thyroid autonomous functioning adenomas  
435 confer TSH-independent growth to thyroid cells. *Oncogene.* 1997 Aug  
436 14;15(7):781–9.
- 437 4. Kumar S, Coenen MJ, Scherer PE, Bahn RS. Evidence for enhanced adipogenesis  
438 in the orbits of patients with Graves' ophthalmopathy. *J Clin Endocrinol Metab.*  
439 2004 Feb;89(2):930–5.
- 440 5. Kumar S, Iyer S, Bauer H, Coenen M, Bahn RS. A Stimulatory Thyrotropin  
441 Receptor Antibody Enhances Hyaluronic Acid Synthesis in Graves' Orbital  
442 Fibroblasts: Inhibition by an IGF-I Receptor Blocking Antibody [Internet]. Vol. 97,  
443 *The Journal of Clinical Endocrinology & Metabolism.* 2012. p. 1681–7. Available  
444 from: <http://dx.doi.org/10.1210/jc.2011-2890>
- 445 6. Zhang L, Grennan-Jones F, Lane C, Rees DA, Dayan CM, Ludgate M. Adipose  
446 tissue depot-specific differences in the regulation of hyaluronan production of  
447 relevance to Graves' orbitopathy. *J Clin Endocrinol Metab.* 2012 Feb;97(2):653–62.
- 448 7. Rosen ED, Walkey CJ, Puigserver P, Spiegelman BM. Transcriptional regulation of  
449 adipogenesis. *Genes Dev.* 2000 Jun 1;14(11):1293–307.
- 450 8. Rosen ED, MacDougald OA. Adipocyte differentiation from the inside out. *Nat Rev*  
451 *Mol Cell Biol.* 2006 Dec;7(12):885–96.
- 452 9. Hilton C, Karpe F, Pinnick KE. Role of developmental transcription factors in white,  
453 brown and beige adipose tissues. *Biochim Biophys Acta.* 2015 May;1851(5):686–  
454 96.
- 455 10. Tejo CR, da Costa PA, Batista RM, Rocha YRR, Borba MA. Subconjunctival fat  
456 prolapse: a disease little known to radiologists. *Radiol Bras.* 2017 Jul;50(4):272–3.
- 457 11. Mourits MP, Prummel MF, Wiersinga WM, Koornneef L. Clinical activity score as a  
458 guide in the management of patients with Graves' ophthalmopathy. *Clin Endocrinol*  
459 *.* 1997 Jul;47(1):9–14.

- 460 12. Martin M. Cutadapt removes adapter sequences from high-throughput sequencing  
461 reads. *EMBnet.journal*. 2011 May 2;17(1):10–2.
- 462 13. Dobin A, Davis CA, Schlesinger F, Drenkow J, Zaleski C, Jha S, et al. STAR:  
463 ultrafast universal RNA-seq aligner. *Bioinformatics*. 2013 Jan 1;29(1):15–21.
- 464 14. Li B, Dewey CN. RSEM: accurate transcript quantification from RNA-Seq data with  
465 or without a reference genome. *BMC Bioinformatics*. 2011 Aug 4;12:323.
- 466 15. Love MI, Huber W, Anders S. Moderated estimation of fold change and dispersion  
467 for RNA-seq data with DESeq2. *Genome Biol*. 2014;15(12):550.
- 468 16. Yu G, Wang L-G, Han Y, He Q-Y. clusterProfiler: an R Package for Comparing  
469 Biological Themes Among Gene Clusters [Internet]. Vol. 16, *OMICS: A Journal of*  
470 *Integrative Biology*. 2012. p. 284–7. Available from:  
471 <http://dx.doi.org/10.1089/omi.2011.0118>
- 472 17. Smith TJ, Koumas L, Gagnon A, Bell A, Sempowski GD, Phipps RP, et al. Orbital  
473 fibroblast heterogeneity may determine the clinical presentation of thyroid-  
474 associated ophthalmopathy. *J Clin Endocrinol Metab*. 2002 Jan;87(1):385–92.
- 475 18. Schneider CA, Rasband WS, Eliceiri KW. NIH Image to ImageJ: 25 years of image  
476 analysis. *Nat Methods*. 2012 Jul;9(7):671–5.
- 477 19. Stuart T, Butler A, Hoffman P, Hafemeister C, Papalexi E, Mauck WM 3rd, et al.  
478 Comprehensive Integration of Single-Cell Data. *Cell*. 2019 Jun 13;177(7):1888–  
479 902.e21.
- 480 20. Hafemeister C, Satija R. Normalization and variance stabilization of single-cell  
481 RNA-seq data using regularized negative binomial regression. *Genome Biol*. 2019  
482 Dec 23;20(1):296.
- 483 21. Korsunsky I, Millard N, Fan J, Slowikowski K, Zhang F, Wei K, et al. Fast, sensitive  
484 and accurate integration of single-cell data with Harmony. *Nat Methods*. 2019  
485 Dec;16(12):1289–96.
- 486 22. Ling JP, Wilks C, Charles R, Leavey PJ, Ghosh D, Jiang L, et al. ASCOT identifies  
487 key regulators of neuronal subtype-specific splicing. *Nat Commun*. 2020 Jan  
488 9;11(1):137.
- 489 23. Pliner HA, Shendure J, Trapnell C. Supervised classification enables rapid  
490 annotation of cell atlases. *Nat Methods*. 2019 Oct;16(10):983–6.
- 491 24. La Manno G, Soldatov R, Zeisel A, Braun E, Hochgerner H, Petukhov V, et al. RNA  
492 velocity of single cells. *Nature*. 2018 Aug;560(7719):494–8.
- 493 25. Melsted P, Boeshaghi AS, Liu L, Gao F, Lu L, Min KHJ, et al. Modular, efficient  
494 and constant-memory single-cell RNA-seq preprocessing. *Nat Biotechnol [Internet]*.

- 495            2021 Apr 1; Available from: <http://dx.doi.org/10.1038/s41587-021-00870-2>
- 496    26. Wolf FA, Angerer P, Theis FJ. SCANPY: large-scale single-cell gene expression  
497    data analysis. *Genome Biol.* 2018 Feb 6;19(1):15.
- 498    27. Bergen V, Lange M, Peidli S, Wolf FA, Theis FJ. Generalizing RNA velocity to  
499    transient cell states through dynamical modeling. *Nat Biotechnol.* 2020  
500    Dec;38(12):1408–14.
- 501    28. Trapnell C, Cacchiarelli D, Grimsby J, Pokharel P, Li S, Morse M, et al. The  
502    dynamics and regulators of cell fate decisions are revealed by pseudotemporal  
503    ordering of single cells. *Nat Biotechnol.* 2014 Apr;32(4):381–6.
- 504    29. Aibar S, González-Blas CB, Moerman T, Huynh-Thu VA, Imrichova H, Hulselmans  
505    G, et al. SCENIC: single-cell regulatory network inference and clustering. *Nat*  
506    *Methods.* 2017 Nov;14(11):1083–6.
- 507    30. Kim DW, Washington PW, Wang ZQ, Lin SH, Sun C, Ismail BT, et al. The cellular  
508    and molecular landscape of hypothalamic patterning and differentiation from  
509    embryonic to late postnatal development. *Nat Commun.* 2020 Aug 31;11(1):4360.
- 510    31. Kim DW, Liu K, Wang ZQ, Zhang YS, Bathini A, Brown MP, et al. Gene regulatory  
511    networks controlling differentiation, survival, and diversification of hypothalamic  
512    Lhx6-expressing GABAergic neurons. *Commun Biol.* 2021 Jan 21;4(1):95.
- 513    32. Chen H, Mester T, Raychaudhuri N, Kauh CY, Gupta S, Smith TJ, et al.  
514    Teprotumumab, an IGF-1R blocking monoclonal antibody inhibits TSH and IGF-1  
515    action in fibrocytes. *J Clin Endocrinol Metab.* 2014 Sep;99(9):E1635–40.
- 516    33. Chen H, Shan SJC, Mester T, Wei Y-H, Douglas RS. TSH-Mediated TNF $\alpha$   
517    Production in Human Fibrocytes Is Inhibited by Teprotumumab, an IGF-1R  
518    Antagonist. *PLoS One.* 2015 Jun 18;10(6):e0130322.
- 519    34. Smith TJ, Kahaly GJ, Ezra DG, Fleming JC, Dailey RA, Tang RA, et al.  
520    Teprotumumab for Thyroid-Associated Ophthalmopathy. *N Engl J Med.* 2017 May  
521    4;376(18):1748–61.
- 522    35. Douglas RS, Kahaly GJ, Patel A, Sile S, Thompson EHZ, Perdok R, et al.  
523    Teprotumumab for the Treatment of Active Thyroid Eye Disease. *N Engl J Med.*  
524    2020 Jan 23;382(4):341–52.
- 525    36. Tao W, Ayala-Haedo JA, Field MG, Pelaez D, Wester ST. RNA-Sequencing Gene  
526    Expression Profiling of Orbital Adipose-Derived Stem Cell Population Implicate  
527    HOX Genes and WNT Signaling Dysregulation in the Pathogenesis of Thyroid-  
528    Associated Orbitopathy. *Invest Ophthalmol Vis Sci.* 2017 Dec 1;58(14):6146–58.
- 529    37. Kumar S, Leontovich A, Coenen MJ, Bahn RS. Gene expression profiling of orbital  
530    adipose tissue from patients with Graves' ophthalmopathy: a potential role for

- 531 secreted frizzled-related protein-1 in orbital adipogenesis. *J Clin Endocrinol Metab.*  
532 2005 Aug;90(8):4730–5.
- 533 38. Ezra DG, Krell J, Rose GE, Bailly M, Stebbing J, Castellano L. Transcriptome-level  
534 microarray expression profiling implicates IGF-1 and Wnt signalling dysregulation in  
535 the pathogenesis of thyroid-associated orbitopathy. *J Clin Pathol.* 2012  
536 Jul;65(7):608–13.
- 537 39. Lee BW, Kumar VB, Biswas P, Ko AC, Alameddine RM, Granet DB, et al.  
538 Transcriptome Analysis of Orbital Adipose Tissue in Active Thyroid Eye Disease  
539 Using Next Generation RNA Sequencing Technology. *Open Ophthalmol J.* 2018  
540 Apr 16;12:41–52.
- 541 40. Wu J, Cai P, Lu Z, Zhang Z, He X, Zhu B, et al. Identification of potential specific  
542 biomarkers and key signaling pathways between osteogenic and adipogenic  
543 differentiation of hBMSCs for osteoporosis therapy. *J Orthop Surg Res.* 2020 Sep  
544 23;15(1):437.
- 545 41. Yeung F, Ramírez CM, Mateos-Gomez PA, Pinzaru A, Ceccarini G, Kabir S, et al.  
546 Nontelomeric role for Rap1 in regulating metabolism and protecting against obesity.  
547 *Cell Rep.* 2013 Jun 27;3(6):1847–56.
- 548 42. Gubelmann C, Schwalie PC, Raghav SK, Röder E, Delessa T, Kiehlmann E, et al.  
549 Identification of the transcription factor ZEB1 as a central component of the  
550 adipogenic gene regulatory network. *Elife.* 2014 Aug 27;3:e03346.
- 551 43. Graham TR, Zhau HE, Odero-Marah VA, Osunkoya AO, Sean Kimbro K, Tighiouart  
552 M, et al. Insulin-like Growth Factor-I–Dependent Up-regulation of ZEB1 Drives  
553 Epithelial-to-Mesenchymal Transition in Human Prostate Cancer Cells [Internet].  
554 Vol. 68, *Cancer Research*. 2008. p. 2479–88. Available from:  
555 <http://dx.doi.org/10.1158/0008-5472.can-07-2559>

556



|                                                           | <b>Control S1</b>                | <b>Control S2</b>                | <b>Control S3</b> | <b>TAO S1</b>         | <b>TAO S2</b>         | <b>TAO S3</b>                                |
|-----------------------------------------------------------|----------------------------------|----------------------------------|-------------------|-----------------------|-----------------------|----------------------------------------------|
| Age (years)                                               | >70                              | 58                               | >70               | 37                    | 51                    | 51                                           |
| Gender                                                    | M                                | M                                | F                 | F                     | F                     | M                                            |
| Race                                                      | Asian                            | C                                | C                 | C                     | AA                    | AA                                           |
| Duration of thyroid disease prior to surgery (approx. mo) | -                                | -                                | -                 | 48                    | 13                    | 13                                           |
| Duration of TED prior to surgery (approx. mo)             | -                                | -                                | -                 | 18                    | 13                    | 10                                           |
| Previous treatment for Graves disease                     | -                                | -                                | -                 | Armor thyroid         | Methimazole           | Carbimazole                                  |
| Previous treatment for TED                                | -                                | -                                | -                 | -                     | -                     | Prednisone, Methylprednisolone, Azathioprine |
| Smoking history                                           | >10 years ago                    | No                               | No                | Former                | No                    | No                                           |
| Exophthalmometry, Hertel (mm)                             | N/A                              | N/A                              | N/A               | 21                    | 27.5                  | 30                                           |
| Presence of compressive optic neuropathy                  | N/A                              | N/A                              | N/A               | No                    | No                    | Yes                                          |
| Surgery                                                   | Excision of orbital fat prolapse | Excision of orbital fat prolapse | Enucleation (UM)  | Orbital decompression | Orbital decompression | Orbital decompression                        |
| Clinical Activity Score (0-7)                             | -                                | -                                | -                 | 0                     | 1                     | 3                                            |

Table 1

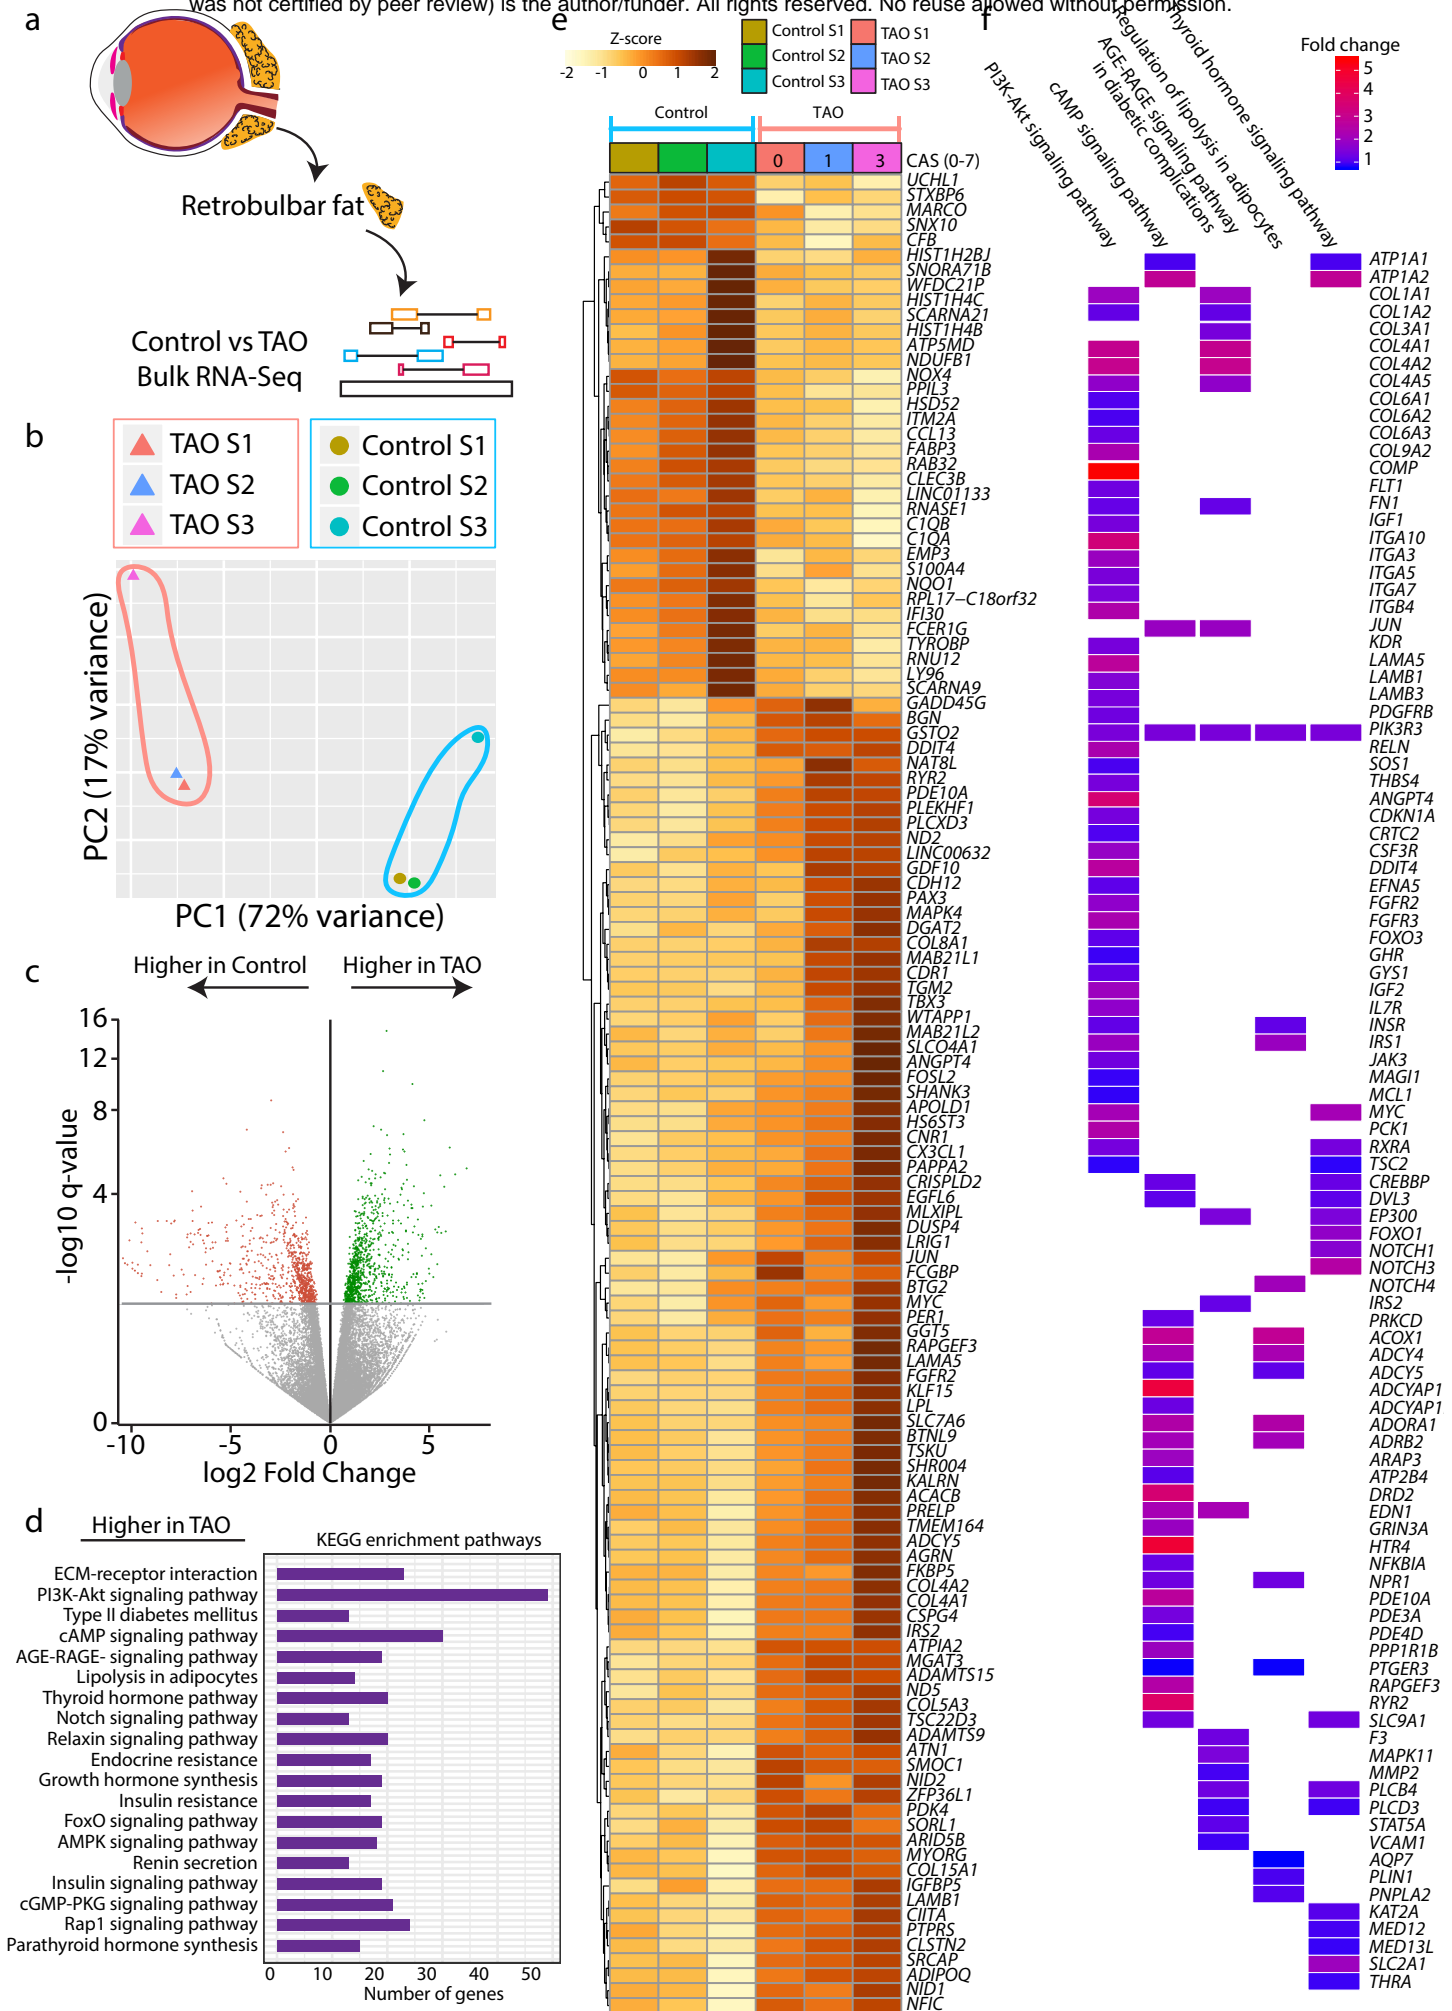

Figure 1

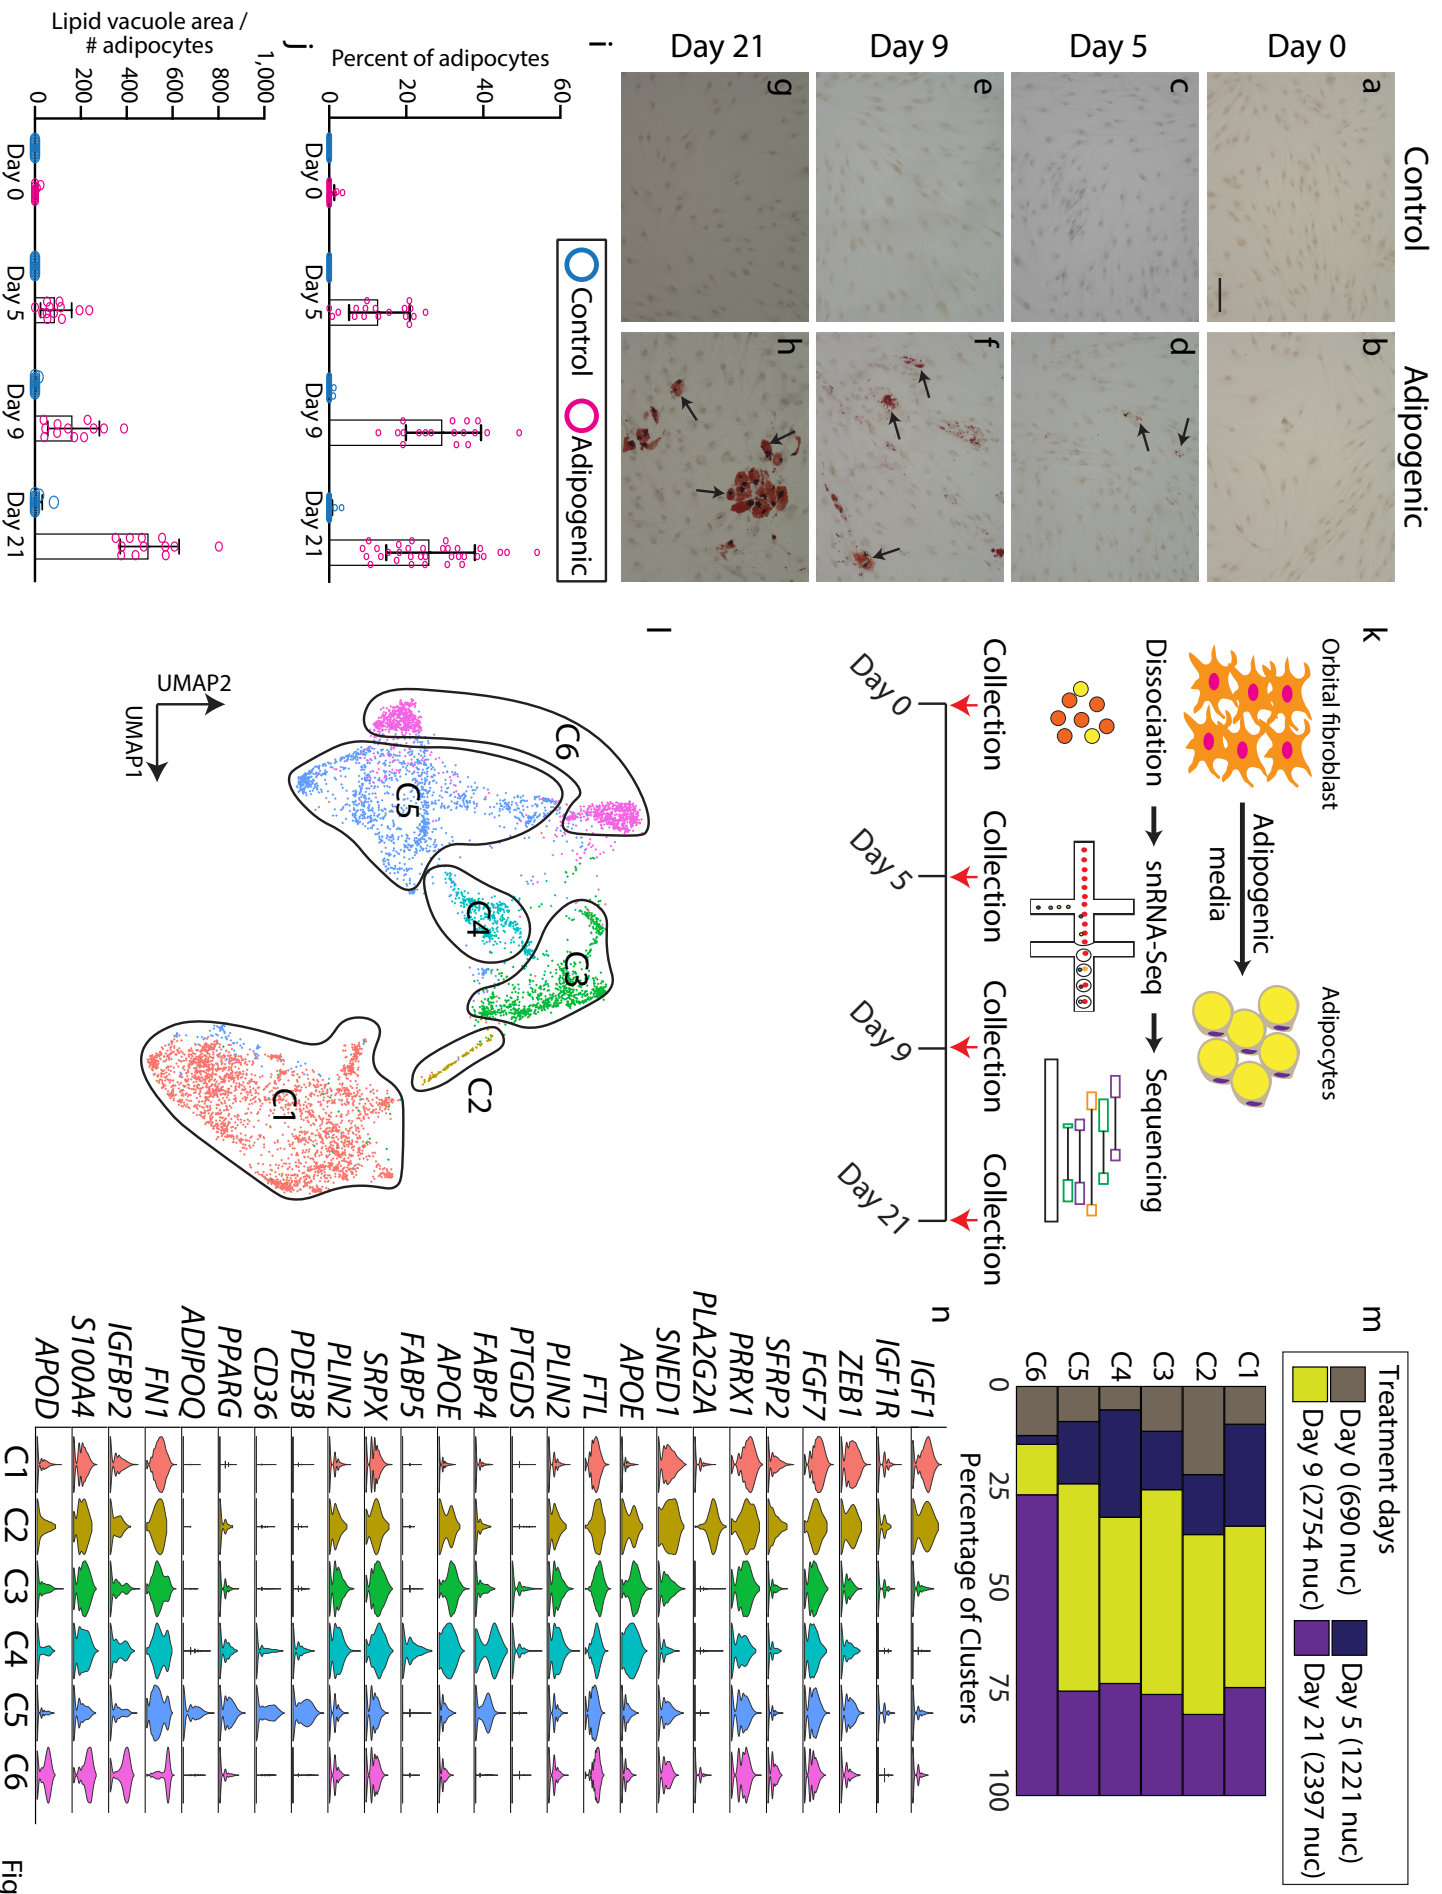

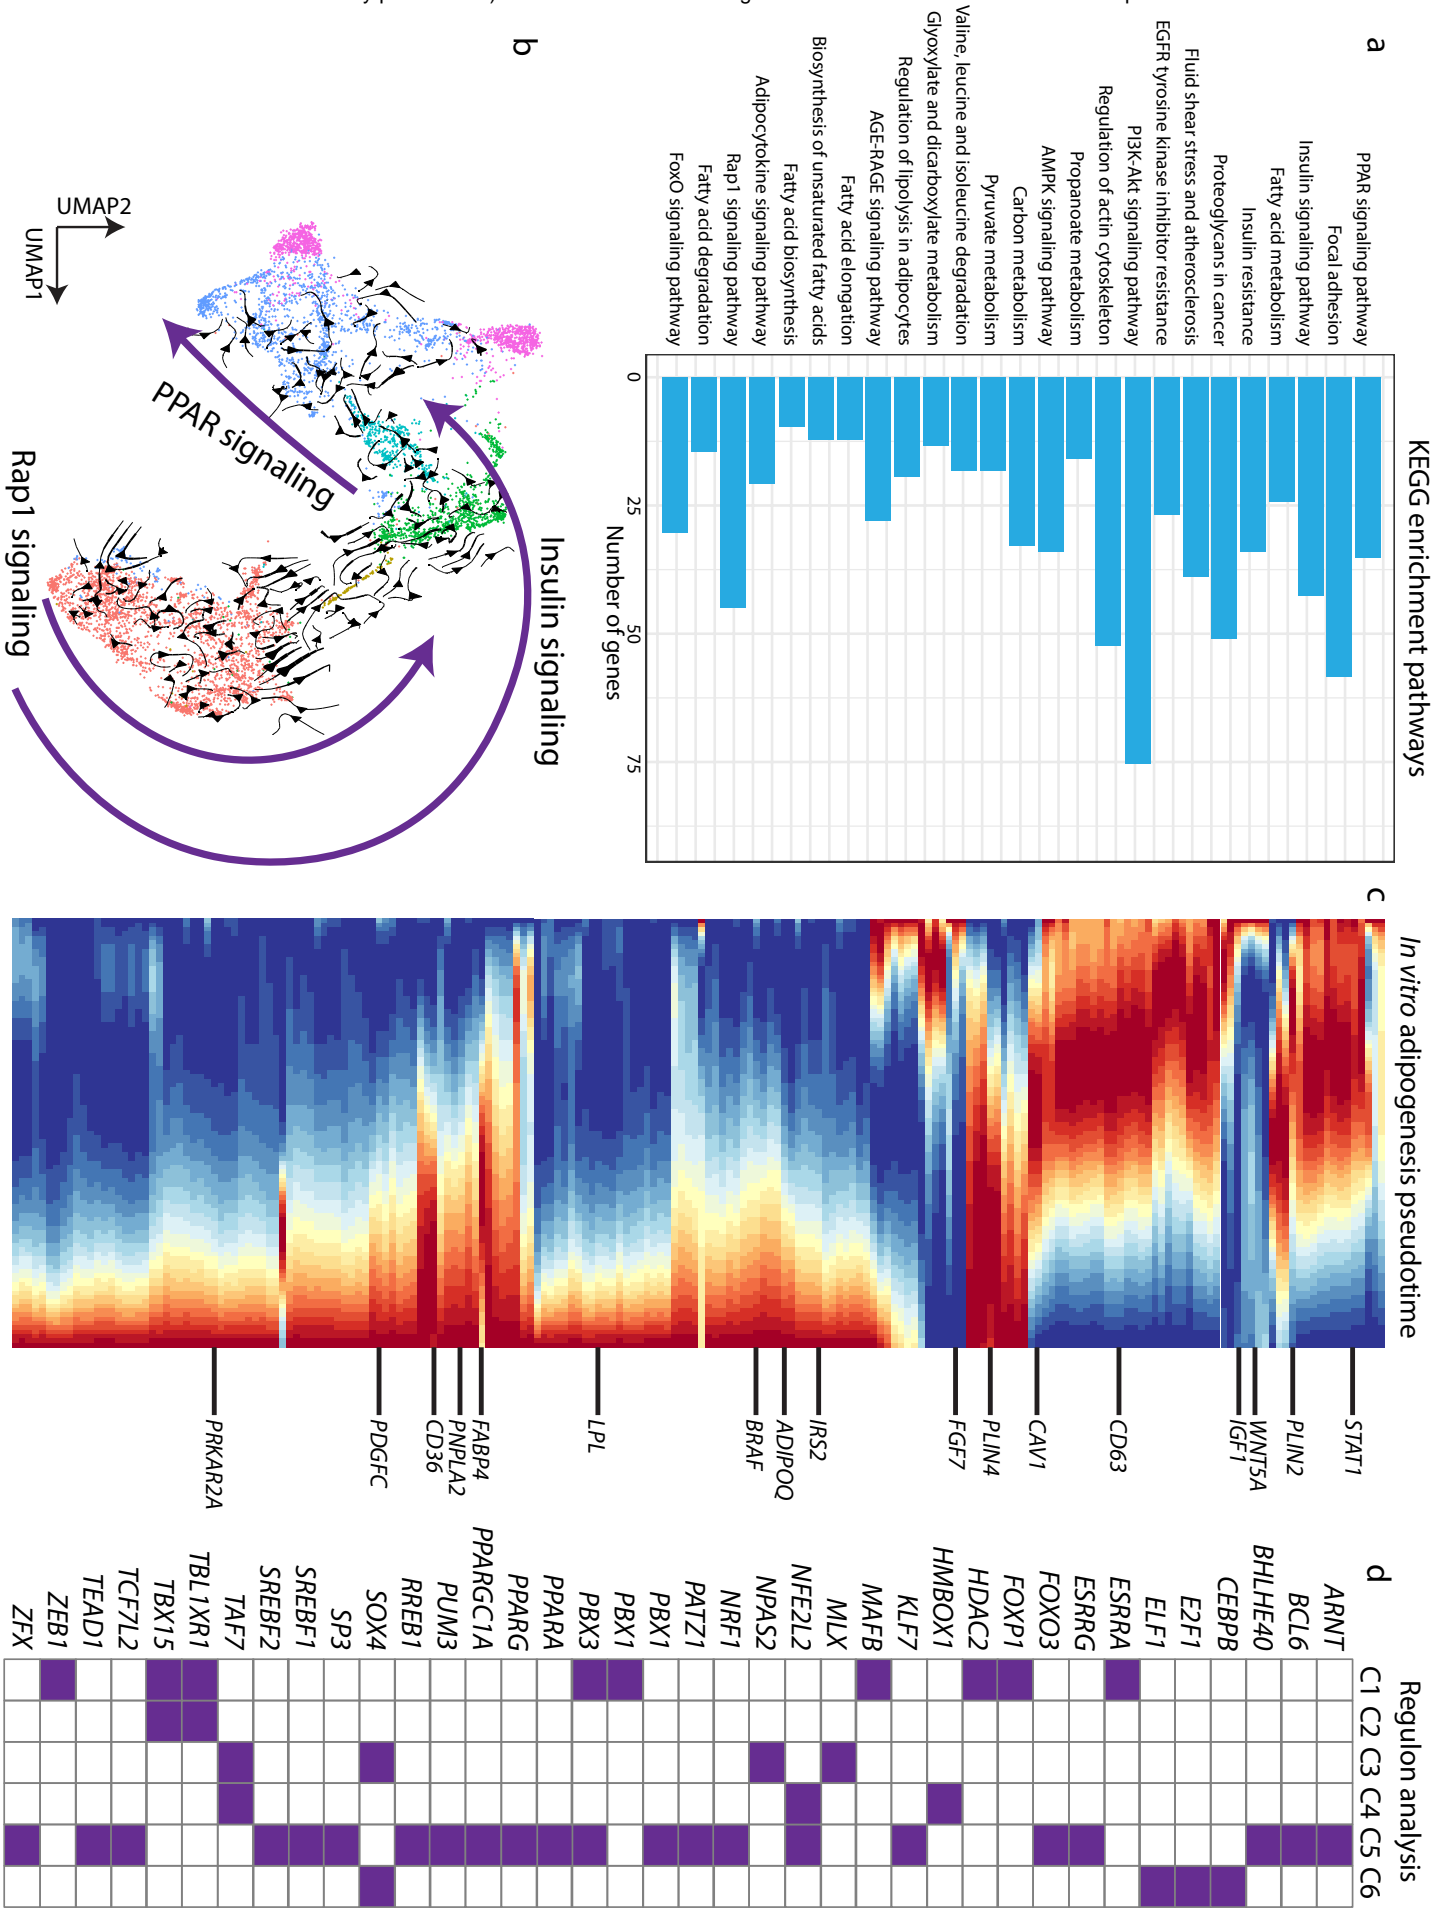

Figure 3

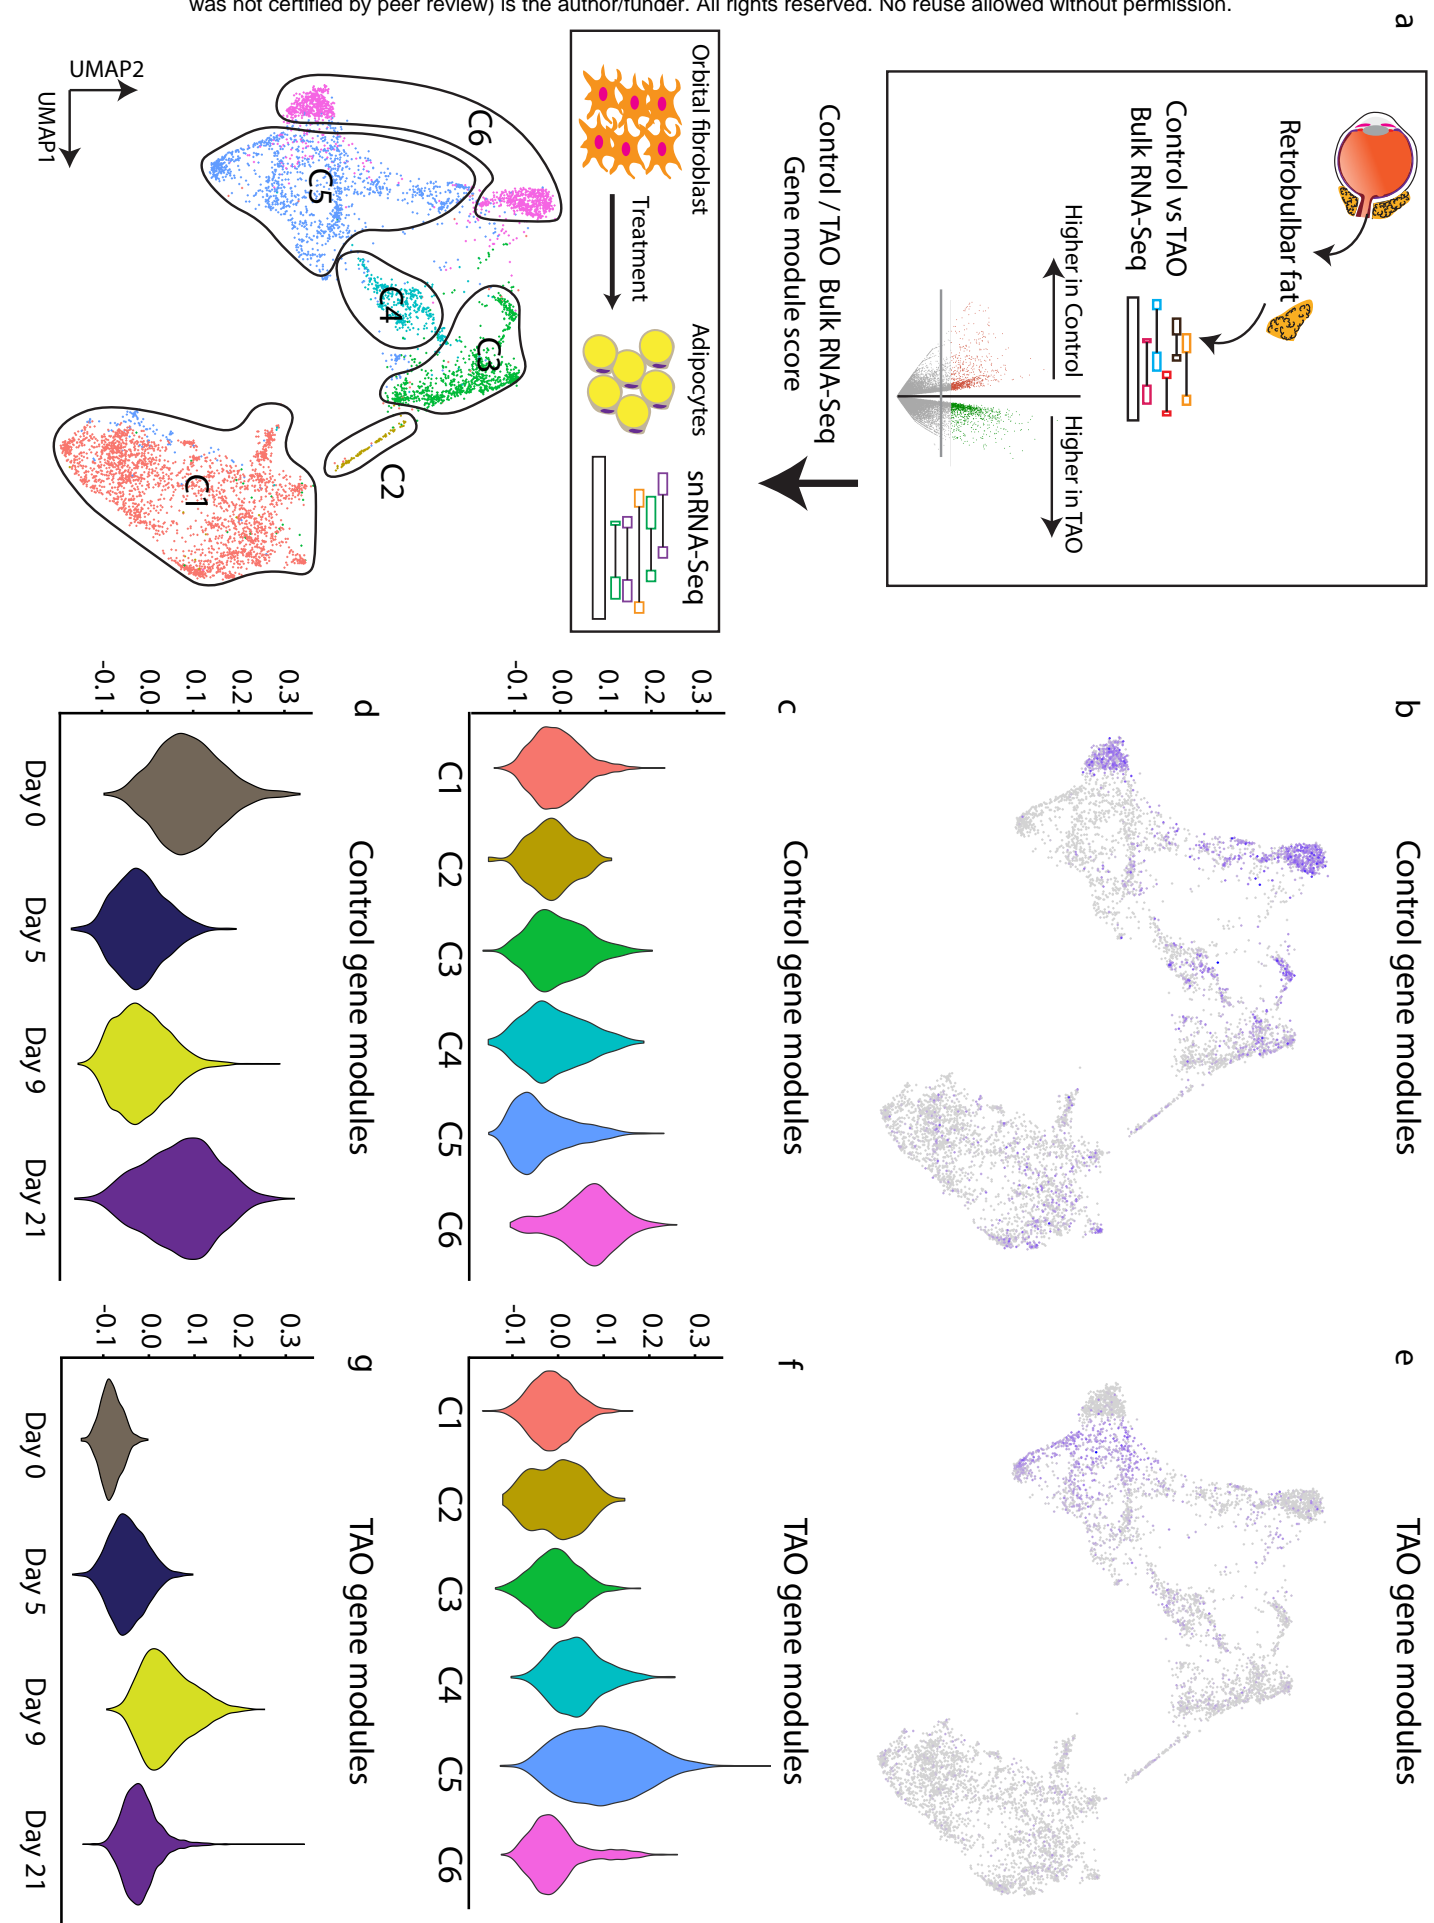

Figure 4
