# Supplementary material for: Transcriptomic profiling of human orbital fat and differentiating orbital fibroblasts
Source: bioRxiv or medRxiv preprint supplement (doi:10.1101/2021.05.13.443857), 2021-05-14
Supplement: Supplementary file [file media-2.pdf]

a

Day 0, 5, 9, 12  
Treatment snRNA-Seq

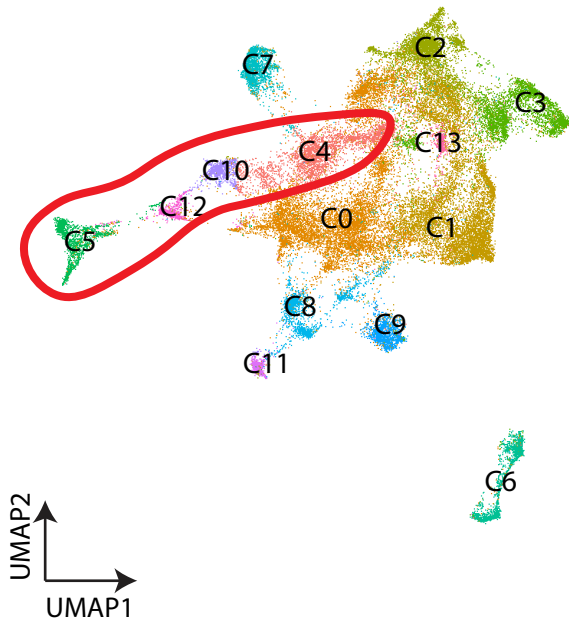

b

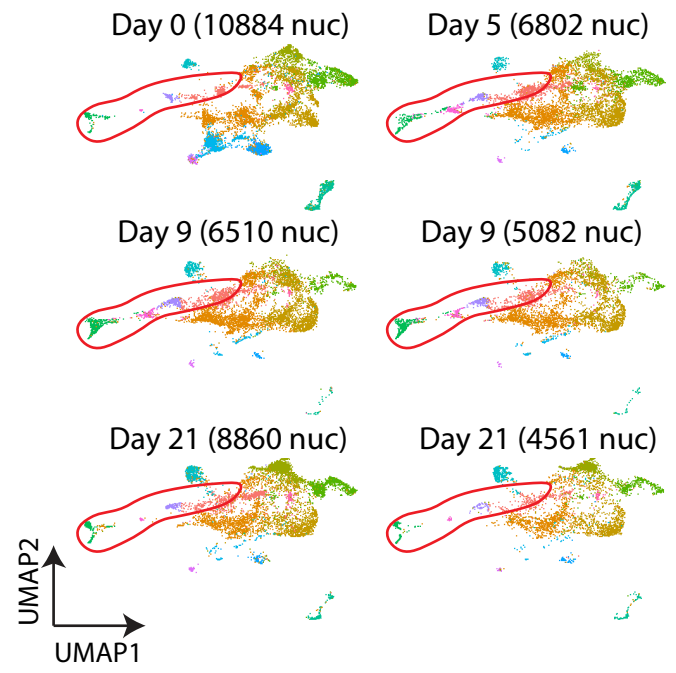

c

*IGF1*

*APOE*

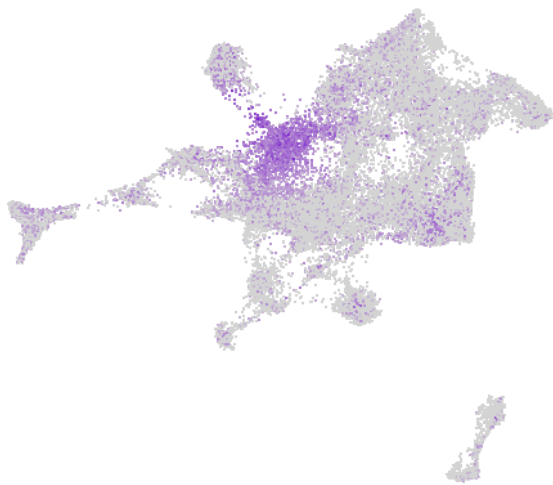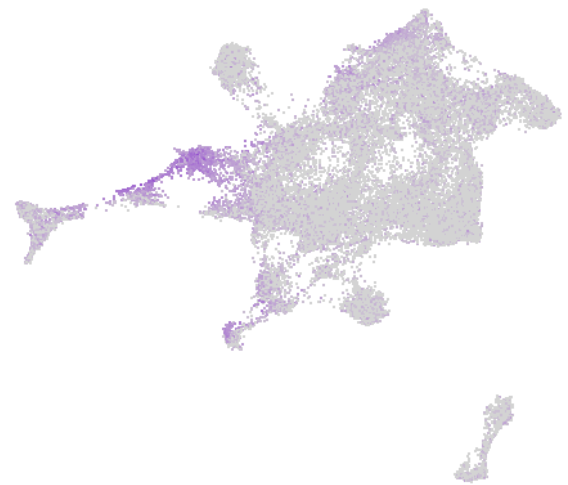

*FABP4*

*ADIPOQ*

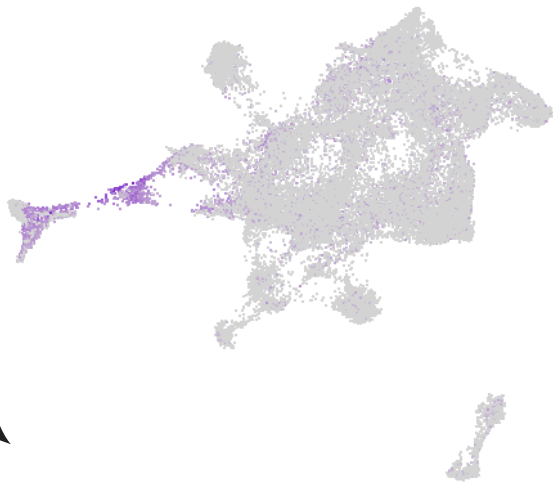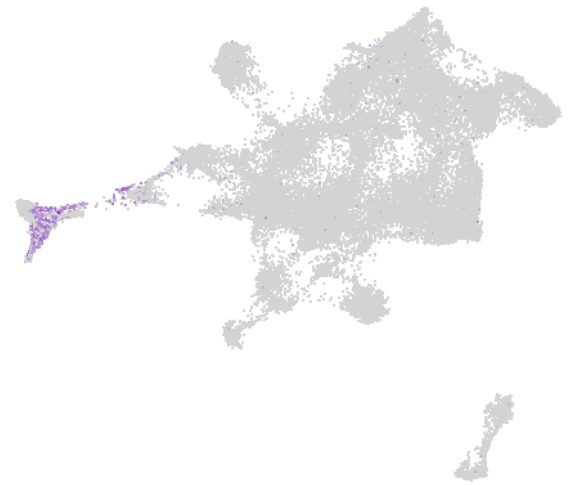

UMAP2

UMAP1
